# Supplementary material for: Aliens on Boats? The Eastern and Western Expansion of the African House Gecko
Source: MDPI journal article supplement (doi:10.3390/genes14020381), 2023-01-31
Supplement: s1 [file s1]

| Taxon         | Voucher code    | GeneBank | Marker | Country      | Locality              | Latitude | Longitude | Group                |
|---------------|-----------------|----------|--------|--------------|-----------------------|----------|-----------|----------------------|
| <i>Hm SAI</i> | CAS 248776      | MN843843 | ND2    | South Africa | Limpopo Prov.         | -22.7064 | 29.8289   | East Africa          |
| <i>Hm SAI</i> | AMB 8301        | HM559638 | ND2    | South Africa | Limpopo Prov.         | -        | -         | East Africa          |
| <i>Hm sp3</i> | MVZ 265935      | MW790398 | ND2    | Mozambique   | Zambezia              | -15.4639 | 36.9778   | East Africa          |
| <i>Hr</i>     | AMNH R-16825    | MN843845 | ND2    | Madagascar   | Mahajanga             | -16.3833 | 47.0381   | East Africa          |
| <i>Hr</i>     | AMNH-R-165402   | MW790313 | ND2    | Madagascar   | Toliara               | -23.3511 | 43.6870   | East Africa          |
| <i>Hr</i>     | AMNH R-16826    | MN843846 | ND2    | Madagascar   | Toliara               | -23.3006 | 43.6592   | East Africa          |
| <i>Hr</i>     | AP11*           | OQ266924 | ND2    | Seychelles   | Assumption, Aldabra   | -9.7342  | 46.5003   | Seychelles (Aldabra) |
| <i>Hr</i>     | AD9*            | OQ266923 | ND2    | Seychelles   | Picard, Aldabra       | -9.4011  | 46.2060   | Seychelles (Aldabra) |
| <i>Hr</i>     | CM1*            | OQ266925 | ND2    | Seychelles   | Menai Island, Aldabra | -9.7100  | 47.5079   | Seychelles (Aldabra) |
| <i>Hm</i>     | YPM 14798       | HM559639 | ND2    | USA          | Florida               | -        | -         | North America        |
| <i>Hm</i>     | LSUMZ 12403     | MN843805 | ND2    | Brazil       | Roraima               | 1.7958   | -61.5281  | South America        |
| <i>Hm</i>     | MB03-000965     | MN843806 | ND2    | STP          | Príncipe              | 1.6257   | 7.4138    | West Africa          |
| <i>Hm</i>     | MB03-000998     | MN843807 | ND2    | STP          | São Tomé              | 0.3382   | 6.7323    | West Africa          |
| <i>Hm</i>     | MB03-001025     | MN843808 | ND2    | STP          | Príncipe              | 1.6259   | 7.4138    | West Africa          |
| <i>Hm</i>     | MB03-001059     | MN843809 | ND2    | STP          | São Tomé              | 0.3499   | 6.5411    | West Africa          |
| <i>Hm</i>     | MB03-001060     | MN843810 | ND2    | STP          | São Tomé              | 0.3499   | 6.5411    | West Africa          |
| <i>Hm</i>     | XXXX 267704     | MN843812 | ND2    | Barbados     | St. Joseph            | 13.1988  | -59.5403  | Central America      |
| <i>Hm</i>     | UF 187193       | MN843813 | ND2    | Angola       | Benguela              | -12.6245 | 13.2327   | West Africa          |
| <i>Hm</i>     | CAS 263381      | MN843814 | ND2    | Angola       | Benguela              | -12.6245 | 13.2327   | West Africa          |
| <i>Hm</i>     | CAS 263382      | MN843815 | ND2    | Angola       | Benguela              | -12.6245 | 13.2327   | West Africa          |
| <i>Hm</i>     | CAS 263373      | MN843816 | ND2    | Angola       | Luanda                | -9.1830  | 13.3706   | West Africa          |
| <i>Hm</i>     | CAS 263374      | MN843817 | ND2    | Angola       | Luanda                | -9.1830  | 13.3706   | West Africa          |
| <i>Hm</i>     | CAS 263375      | MN843818 | ND2    | Angola       | Luanda                | -9.1830  | 13.3706   | West Africa          |
| <i>Hm</i>     | CAS 263522      | MN843820 | ND2    | Angola       | Namibe                | -15.2089 | 12.1015   | West Africa          |
| <i>Hm</i>     | CAS 263523      | MN843821 | ND2    | Angola       | Namibe                | -15.2089 | 12.1015   | West Africa          |
| <i>Hm</i>     | CAS 263518      | MN843823 | ND2    | Angola       | Luanda                | -8.9977  | 13.2638   | West Africa          |
| <i>Hm</i>     | INBAC/AMB 1066  | MN843824 | ND2    | Angola       | Luanda                | -8.8155  | 13.2359   | West Africa          |
| <i>Hm</i>     | MHNC-UP/Rep 494 | MN843825 | ND2    | Angola       | Malanje               | -9.7712  | 15.1572   | West Africa          |
| <i>Hm</i>     | CAS 263432      | MN843826 | ND2    | Angola       | Kwanza Sul            | -11.1981 | 13.8355   | West Africa          |
| <i>Hm</i>     | CAS 263433      | MN843827 | ND2    | Angola       | Kwanza Sul            | -11.1981 | 13.8355   | West Africa          |
| <i>Hm</i>     | CAS 263431      | MN843829 | ND2    | Angola       | Kwanza Sul            | -10.8675 | 14.3216   | West Africa          |
| <i>Hm</i>     | CAS 263430      | MN843830 | ND2    | Angola       | Kwanza Sul            | -10.8672 | 14.3244   | West Africa          |
| <i>Hm</i>     | UF 187201       | MN843831 | ND2    | Angola       | Kwanza Sul            | -10.8675 | 14.3228   | West Africa          |
| <i>Hm</i>     | CAS 258427      | MN843832 | ND2    | Angola       | Malanje               | -9.8727  | 16.7009   | West Africa          |
| <i>Hm</i>     | INBAC/JVV 9516  | MN843833 | ND2    | Angola       | Luanda                | -9.1839  | 13.3722   | West Africa          |
| <i>Hm</i>     | INBAC/JVV 9524  | MN843838 | ND2    | Angola       | Luanda                | -9.1839  | 13.3722   | West Africa          |
| <i>Hm</i>     | INBAC/JVV 9525  | MN843839 | ND2    | Angola       | Luanda                | -9.1839  | 13.3722   | West Africa          |
| <i>Hm</i>     | INBAC/JVV 9529  | MN843840 | ND2    | Angola       | Luanda                | -9.1839  | 13.3722   | West Africa          |
| <i>Hm</i>     | INBAC/JVV 9531  | MN843841 | ND2    | Angola       | Luanda                | -9.1839  | 13.3722   | West Africa          |
| <i>Hm</i>     | INBAC/JVV 9535  | MN843842 | ND2    | Angola       | Luanda                | -9.1839  | 13.3722   | West Africa          |
| <i>Hm</i>     | CAS 263443      | MN843844 | ND2    | Angola       | Luanda                | -9.1839  | 13.3722   | West Africa          |
| <i>Hm</i>     | PEM R19461      | MZ616965 | ND2    | Angola       | Lunda                 | -8.4184  | 20.7419   | West Africa          |
| <i>Hm</i>     | NB1083          | MZ616966 | ND2    | Angola       | Huíla                 | -14.9189 | 13.4853   | West Africa          |
| <i>Hm</i>     | FKH0443         | MZ616967 | ND2    | Angola       | Cuanza                | -9.1431  | 14.3672   | West Africa          |
| <i>Hm</i>     | FKH0444         | MZ616968 | ND2    | Angola       | Cuanza                | -9.1431  | 14.3672   | West Africa          |
| <i>Hm</i>     | FKH0031         | MZ616969 | ND2    | Angola       | Cuanza                | -11.1972 | 14.3406   | West Africa          |
| <i>Hm</i>     | FKH0219         | MZ616970 | ND2    | Angola       | Luanda                | -9.0606  | 13.3539   | West Africa          |
| <i>Hm</i>     | FKH0288         | MZ616971 | ND2    | Angola       | Malanje               | -9.8194  | 16.6539   | West Africa          |
| <i>Hm</i>     | P9-220          | MZ616972 | ND2    | Angola       | Cuanza                | -11.1972 | 14.3406   | West Africa          |

|           |             |          |     |                   |                      |          |          |                 |
|-----------|-------------|----------|-----|-------------------|----------------------|----------|----------|-----------------|
| <i>Hm</i> | P9-221      | MZ616973 | ND2 | Angola            | Cuanza               | -11.1972 | 14.3406  | West Africa     |
| <i>Hm</i> | MB03-001025 | MT613986 | ND2 | STP               | Príncipe             | -        | -        | West Africa     |
| <i>Hm</i> | MB03-001060 | MT613987 | ND2 | STP               | São Tomé             | -        | -        | West Africa     |
| <i>Hm</i> | MB03-001059 | MT613988 | ND2 | STP               | São Tomé             | -        | -        | West Africa     |
| <i>Hm</i> | MB03-000965 | MT613989 | ND2 | STP               | Príncipe             | -        | -        | West Africa     |
| <i>Hm</i> | MB03-000998 | MT613990 | ND2 | STP               | Príncipe             | -        | -        | West Africa     |
| <i>Hm</i> | 269034 ND2  | MW790299 | ND2 | Haiti             | Sud                  | 18.1090  | -73.9403 | Central America |
| <i>Hm</i> | 269269 ND2  | MW790300 | ND2 | Haiti             | Gonave Island        | 18.8349  | -72.8666 | Central America |
| <i>Hm</i> | AMB 4151    | MW790301 | ND2 | Puerto Rico       | Guánica              | 17.9535  | -66.8485 | Central America |
| <i>Hm</i> | BPN 1215    | MW790314 | ND2 | Guyana            | Imbaimadai           | 5.6925   | -60.2820 | South America   |
| <i>Hm</i> | CAS 207964  | MW790315 | ND2 | Equatorial Guinea | Bioko Norte          | 3.7518   | 8.7834   | West Africa     |
| <i>Hm</i> | CAS 207968  | MW790316 | ND2 | Equatorial Guinea | Bioko Norte          | 3.7518   | 8.7834   | West Africa     |
| <i>Hm</i> | CAS 207984  | MW790317 | ND2 | Equatorial Guinea | Bioko Norte          | 3.4613   | 8.5524   | West Africa     |
| <i>Hm</i> | CAS 231714  | MW790318 | ND2 | Trinidad & Tobago | Tunapuna-Piarco      | 10.5926  | -61.3474 | South America   |
| <i>Hm</i> | CAS 233427  | MW790319 | ND2 | STP               | Príncipe             | 1.6399   | 7.4193   | West Africa     |
| <i>Hm</i> | CAS 245322  | MW790320 | ND2 | Trinidad & Tobago | Tobago               | 11.2928  | -60.6289 | South America   |
| <i>Hm</i> | CAS 249873  | MW790322 | ND2 | Cameroon          | Northwest            | 6.0097   | 10.1295  | West Africa     |
| <i>Hm</i> | CAS 249883  | MW790323 | ND2 | Cameroon          | Northwest            | 5.9661   | 10.0420  | West Africa     |
| <i>Hm</i> | CAS 250633  | MW790324 | ND2 | Burundi           | Gitega               | -3.4271  | 29.9346  | East Africa     |
| <i>Hm</i> | CAS 250796  | MW790325 | ND2 | Burundi           | Rutana               | -4.0277  | 30.1507  | East Africa     |
| <i>Hm</i> | CAS 250810  | MW790326 | ND2 | Burundi           | Bururi               | -3.9796  | 29.4369  | East Africa     |
| <i>Hm</i> | CAS 253263  | MW790327 | ND2 | Cameroon          | Central              | 3.8987   | 11.5122  | West Africa     |
| <i>Hm</i> | CAS 253264  | MW790328 | ND2 | Cameroon          | Central              | 3.8987   | 11.5122  | West Africa     |
| <i>Hm</i> | CAS 253316  | MW790329 | ND2 | Cameroon          | East                 | 2.9007   | 13.9033  | West Africa     |
| <i>Hm</i> | CAS 253317  | MW790330 | ND2 | Cameroon          | East                 | 2.9007   | 13.9033  | West Africa     |
| <i>Hm</i> | CAS 253460  | MW790331 | ND2 | Cameroon          | South                | 2.9399   | 11.9763  | West Africa     |
| <i>Hm</i> | CAS 253461  | MW790332 | ND2 | Cameroon          | South                | 2.9399   | 11.9763  | West Africa     |
| <i>Hm</i> | CAS 253610  | MW790333 | ND2 | Cameroon          | South                | 3.1983   | 12.5228  | West Africa     |
| <i>Hm</i> | CAS 253849  | MW790334 | ND2 | Cameroon          | Littoral             | 4.9538   | 9.8661   | West Africa     |
| <i>Hm</i> | CAS 255988  | MW790335 | ND2 | Uganda            | Central              | 0.6167   | 31.4749  | East Africa     |
| <i>Hm</i> | CAS 256075  | MW790336 | ND2 | Uganda            | Kampala District     | 0.3413   | 32.5838  | East Africa     |
| <i>Hm</i> | CAS 256079  | MW790337 | ND2 | Uganda            | Central              | 0.3996   | 33.0105  | East Africa     |
| <i>Hm</i> | CAS 256086  | MW790338 | ND2 | Uganda            | Mukono District      | 0.4370   | 32.9543  | East Africa     |
| <i>Hm</i> | CAS 256279  | MW790339 | ND2 | Uganda            | Eastern              | 0.4293   | 33.1959  | East Africa     |
| <i>Hm</i> | CRSN84      | MW790340 | ND2 | DRC               | Orientale            | 1.9589   | 30.0357  | Central Africa  |
| <i>Hm</i> | EBG 1287    | MW790349 | ND2 | DRC               | South Kivu           | -1.8747  | 28.4524  | Central Africa  |
| <i>Hm</i> | ELI 1945    | MW790351 | ND2 | DRC               | Bandundu             | -2.7300  | 18.1443  | Central Africa  |
| <i>Hm</i> | ELI 2274    | MW790352 | ND2 | DRC               | Equateur             | -0.2594  | 19.6358  | Central Africa  |
| <i>Hm</i> | ELI 342     | MW790353 | ND2 | DRC               | Katanga              | -7.2936  | 27.3947  | Central Africa  |
| <i>Hm</i> | JB 218      | MW790354 | ND2 | Puerto Rico       | Guanica              | 17.9705  | -66.9094 | Central America |
| <i>Hm</i> | LSUMZ 13920 | MW790355 | ND2 | Brazil            | Para                 | 2.5027   | -53.0449 | South America   |
| <i>Hm</i> | LSUMZ 20258 | MW790356 | ND2 | Ghana             | Greater Accra Region | 5.8391   | 0.1085   | West Africa     |
| <i>Hm</i> | MCZR-187693 | MW790381 | ND2 | Gabon             | Estuaire             | 0.4487   | 9.4124   | West Africa     |
| <i>Hm</i> | MHNG 271551 | MW790386 | ND2 | Cameroon          | Central              | 3.8762   | 11.5119  | West Africa     |
| <i>Hm</i> | MHNG 271552 | MW790387 | ND2 | Cameroon          | Central              | 3.8762   | 11.5119  | West Africa     |
| <i>Hm</i> | MHNG 271553 | MW790388 | ND2 | Cameroon          | Central              | 3.8762   | 11.5119  | West Africa     |
| <i>Hm</i> | MHNG 271554 | MW790389 | ND2 | Cameroon          | Littoral             | 4.7166   | 9.7277   | West Africa     |
| <i>Hm</i> | MVZ 245309  | MW790390 | ND2 | Ghana             | Greater Accra Region | 5.8803   | 0.0378   | West Africa     |
| <i>Hm</i> | MVZ 249705  | MW790391 | ND2 | Ghana             | Greater Accra Region | 5.6074   | -0.1718  | West Africa     |
| <i>Hm</i> | MVZ 253216  | MW790392 | ND2 | Nigeria           | Akwa Ibom            | 5.0527   | 7.9039   | West Africa     |

|           |              |              |                |                     |          |            |                        |
|-----------|--------------|--------------|----------------|---------------------|----------|------------|------------------------|
| <i>Hm</i> | MVZ 253217   | MW790393 ND2 | Nigeria        | Akwa Ibom           | 5.0527   | 7.9039     | West Africa            |
| <i>Hm</i> | MVZ 265926   | MW790394 ND2 | Mozambique     | Maputo              | -26.8478 | 32.8839    | East Africa            |
| <i>Hm</i> | NCSM 76794   | MW790402 ND2 | Gabon          | Estuaire            | 0.4536   | 10.2781    | West Africa            |
| <i>Hm</i> | NMNH 576055  | MW790404 ND2 | DRC            | Likouala            | 1.5142   | 17.9378    | West Africa            |
| <i>Hm</i> | NMNH 576056  | MW790405 ND2 | DRC            | Likouala            | 1.5142   | 17.9378    | Central Africa         |
| <i>Hm</i> | NMNH 576114  | MW790406 ND2 | DRC            | Likouala            | 1.0769   | 17.2997    | Central Africa         |
| <i>Hm</i> | NMNH 576122  | MW790407 ND2 | DRC            | Likouala            | 1.0769   | 17.2997    | Central Africa         |
| <i>Hm</i> | NMNH 584223  | MW790409 ND2 | DRC            | Lekoumou            | -2.5393  | 13.5427    | Central Africa         |
| <i>Hm</i> | NMNH 584224  | MW790410 ND2 | DRC            | Lekoumou            | -2.6668  | 13.5958    | Central Africa         |
| <i>Hm</i> | NMNH 584225  | MW790411 ND2 | DRC            | Lekoumou            | -2.6668  | 13.5958    | Central Africa         |
| <i>Hm</i> | NMNH 584226  | MW790412 ND2 | DRC            | Lekoumou            | -2.6752  | 13.5860    | Central Africa         |
| <i>Hm</i> | NMNH 584227  | MW790413 ND2 | DRC            | Lekoumou            | -2.6668  | 13.5958    | Central Africa         |
| <i>Hm</i> | NMNH 584296  | MW790415 ND2 | DRC            | Likouala            | 1.0881   | 17.3074    | Central Africa         |
| <i>Hm</i> | NMNH 584302  | MW790416 ND2 | DRC            | Likouala            | 1.0881   | 17.3074    | Central Africa         |
| <i>Hm</i> | NMNH 584322  | MW790417 ND2 | DRC            | Likouala            | 1.0881   | 17.3074    | Central Africa         |
| <i>Hm</i> | NMNH 584323  | MW790418 ND2 | DRC            | Likouala            | 1.0881   | 17.3074    | Central Africa         |
| <i>Hm</i> | NMNH 584366  | MW790419 ND2 | DRC            | Pool                | -4.1865  | 14.9570    | Central Africa         |
| <i>Hm</i> | NMNH 584368  | MW790420 ND2 | DRC            | Pool                | -4.1865  | 14.9570    | Central Africa         |
| <i>Hm</i> | NMNH 584370  | MW790421 ND2 | DRC            | Pool                | -4.1865  | 14.9570    | Central Africa         |
| <i>Hm</i> | TM 84932     | MW790423 ND2 | South Africa   | Eastern Cape        | -32.4777 | 28.6514    | East Africa            |
| <i>Hm</i> | UWBM 6004    | MW790424 ND2 | Ghana          | Ashanti Region      | 6.7366   | -1.5294    | West Africa            |
| <i>Hm</i> | UWBM 6005    | MW790425 ND2 | Ghana          | Ashanti Region      | 6.8297   | -1.7214    | West Africa            |
| <i>Hm</i> | UWBM 9094    | MW790426 ND2 | Ghana          | Western Region      | 5.2818   | -2.6417    | West Africa            |
| <i>Hm</i> | UWBM 9095    | MW790427 ND2 | Ghana          | Western Region      | 5.2818   | -2.6417    | West Africa            |
| <i>Hm</i> | UWBM 9111    | MW790428 ND2 | Ghana          | Western Region      | 5.2818   | -2.6417    | West Africa            |
| <i>Hm</i> | UWBM 9112    | MW790429 ND2 | Ghana          | Western Region      | 5.2818   | -2.6417    | West Africa            |
| <i>Hm</i> | YPM 18123    | MW790432 ND2 | Dutch Antilles | Curaçao             | 12.1196  | -68.8805   | South America          |
| <i>Hm</i> | YPM 18131    | MW790433 ND2 | Dutch Antilles | Curaçao             | 12.3754  | -69.1567   | South America          |
| <i>Hm</i> | YPM 14798    | MW790434 ND2 | USA            | Florida             | 24.6743  | -81.3879   | North America          |
| <i>Hm</i> | ZFMK 75377   | MW790435 ND2 | Cameroon       | Littoral            | 4.9172   | 9.9892     | West Africa            |
| <i>Hm</i> | ZFMK 89590   | MW790436 ND2 | Cameroon       | Littoral            | 4.7166   | 9.7277     | West Africa            |
| <i>Hm</i> | ZFMK 89591   | MW790437 ND2 | Cameroon       | Central             | 3.8675   | 11.5204    | West Africa            |
| <i>Hm</i> | ZFMK 89592   | MW790438 ND2 | Cameroon       | Central             | 3.8762   | 11.5119    | West Africa            |
| <i>Hm</i> | ZFMK 89593   | MW790439 ND2 | Cameroon       | Central             | 3.8762   | 11.5119    | West Africa            |
| <i>Hm</i> | ZFMK 89594   | MW790440 ND2 | Cameroon       | Central             | 3.8762   | 11.5119    | West Africa            |
| <i>Hm</i> | ZFMK 89595   | MW790441 ND2 | Cameroon       | Southwest           | 4.6326   | 9.4353     | West Africa            |
| <i>Hm</i> | JEM1864      | JX041368 ND2 | Kenya          | Taita Taveta        | -3.4000  | 38.3640    | East Africa            |
| <i>Hm</i> | SA20*        | OQ266928 ND2 | South Africa   | Durban              | -29.8333 | 31.0167    | East Africa            |
| <i>Hm</i> | TZ12*        | OQ266931 ND2 | Tanzania       | Dar Es Salaam       | -6.8050  | 39.2896    | East Africa            |
| <i>Hm</i> | MA5*         | OQ266926 ND2 | Seychelles     | Airport, Mahé       | -4.6717  | 55.5108    | Seychelles (Granitics) |
| <i>Hm</i> | MY46*        | OQ266927 ND2 | Comoros        | Chirongoui, Mayotte | -12.9360 | 45.1443    | Comoros                |
| <i>Hm</i> | Z40*         | OQ266932 ND2 | Tanzania       | Upenja, Zanzibar    | -5.9942  | 39.3525    | East Africa            |
| <i>Hm</i> | Madeira1 12S | AY156909 12S | Portugal       | Madeira             | -        | -          | Madeira                |
| <i>Hm</i> | DB31558      | MW665160 12S | Portugal       | Madeira             | 32.6472  | -16.969386 | Madeira                |
| <i>Hm</i> | DB31405      | MW665161 12S | Portugal       | Madeira             | 32.6443  | -16.915567 | Madeira                |
| <i>Hm</i> | DB31536      | MW665162 12S | Portugal       | Madeira             | 32.6443  | -16.915567 | Madeira                |
| <i>Hm</i> | DB31559      | MW665163 12S | Portugal       | Madeira             | 32.6470  | -16.973176 | Madeira                |
| <i>Hm</i> | DB31560      | MW665164 12S | Portugal       | Madeira             | 32.6472  | -16.969386 | Madeira                |
| <i>Hm</i> | DB31537      | MW665165 12S | Portugal       | Madeira             | 32.6443  | -16.915567 | Madeira                |
| <i>Hm</i> | DB31432      | MW665166 12S | Portugal       | Madeira             | 32.6443  | -16.915567 | Madeira                |

|           |          |          |      |            |                     |         |            |                          |
|-----------|----------|----------|------|------------|---------------------|---------|------------|--------------------------|
| <i>Hm</i> | DB31552  | MW665167 | 12S  | Portugal   | Madeira             | 32.6472 | -16.969386 | Madeira                  |
| <i>Hm</i> | DB31562  | MW665168 | 12S  | Portugal   | Madeira             | 32.6472 | -16.969386 | Madeira                  |
| <i>Hm</i> | DB31524  | MW665169 | 12S  | Portugal   | Madeira             | 32.6443 | -16.915567 | Madeira                  |
| <i>Hm</i> | DB31549  | MW665170 | 12S  | Portugal   | Madeira             | 32.6443 | -16.915567 | Madeira                  |
| <i>Hm</i> | DB31554  | MW665171 | 12S  | Portugal   | Madeira             | 32.6472 | -16.969386 | Madeira                  |
| <i>Hm</i> | DB31563  | MW665172 | 12S  | Portugal   | Madeira             | 32.6472 | -16.969386 | Madeira                  |
| <i>Hm</i> | DB31525  | MW665173 | 12S  | Portugal   | Madeira             | 32.6443 | -16.915567 | Madeira                  |
| <i>Hm</i> | DB31550  | MW665174 | 12S  | Portugal   | Madeira             | 32.6443 | -16.915567 | Madeira                  |
| <i>Hm</i> | DB31555  | MW665175 | 12S  | Portugal   | Madeira             | 32.6472 | -16.969386 | Madeira                  |
| <i>Hm</i> | DB31344  | MW665176 | 12S  | Portugal   | Madeira             | 32.6443 | -16.915567 | Madeira                  |
| <i>Hm</i> | DB31526  | MW665177 | 12S  | Portugal   | Madeira             | 32.6443 | -16.915567 | Madeira                  |
| <i>Hm</i> | DB31345  | MW665178 | 12S  | Portugal   | Madeira             | 32.6443 | -16.915567 | Madeira                  |
| <i>Hm</i> | DB31527  | MW665179 | 12S  | Portugal   | Madeira             | 32.6443 | -16.915567 | Madeira                  |
| <i>Hm</i> | DB31346  | MW665180 | 12S  | Portugal   | Madeira             | 32.6443 | -16.915567 | Madeira                  |
| <i>Hm</i> | DB31533  | MW665181 | 12S  | Portugal   | Madeira             | 32.6443 | -16.915567 | Madeira                  |
| <i>Hm</i> | DB31428  | MW665182 | 12S  | Portugal   | Madeira             | 32.6443 | -16.915567 | Madeira                  |
| <i>Hm</i> | DB31561  | MW665183 | 12S  | Portugal   | Madeira             | 32.6472 | -16.969386 | Madeira                  |
| <i>Hm</i> | DB31548  | MW665184 | 12S  | Portugal   | Madeira             | 32.6443 | -16.915567 | Madeira                  |
| <i>Hm</i> | DB31557  | MW665185 | 12S  | Portugal   | Madeira             | 32.6472 | -16.969386 | Madeira                  |
| <i>Hm</i> | DB31553  | MW665157 | 12S  | Portugal   | Madeira             | 32.6470 | -16.973176 | Madeira                  |
| <i>Hm</i> | DB31564  | MW665158 | 12S  | Portugal   | Madeira             | 32.6470 | -16.973176 | Madeira                  |
| <i>Hm</i> | DB31556  | MW665159 | 12S  | Portugal   | Madeira             | 32.6472 | -16.969386 | Madeira                  |
| <i>Hm</i> | E609.14  | DQ120376 | 12S  | Kenya      | Kilifi District     | -       | -          | East Africa              |
| <i>Hm</i> | E609.20  | DQ120377 | 12S  | Uganda     | Masaka District     | -       | -          | East Africa              |
| <i>Hm</i> | E509.21  | DQ120360 | 12S  | Kenya      | Kilifi District     | -       | -          | East Africa              |
| <i>Hm</i> | JS173    | KC818685 | 12S  | Uganda     | -                   | -       | -          | East Africa              |
| <i>Hm</i> | E609.21  | DQ120353 | 12S  | Uganda     | Rukungiri District  | -       | -          | East Africa              |
| <i>Hm</i> | E609.22  | DQ120354 | 12S  | USA        | Florida             | -       | -          | North America            |
| <i>Hm</i> | E609.23  | DQ120355 | 12S  | USA        | Florida             | -       | -          | North America            |
| <i>Hm</i> | Bichoa   | AF324794 | 12S  | Cabo Verde | S. Vicente          | -       | -          | Cabo Verde (S. Vicente)  |
| <i>Hm</i> | 31HbouSV | DQ120356 | 12S  | Cabo Verde | S. Vicente          | -       | -          | Cabo Verde (S. Vicente)  |
| <i>Hm</i> | 32HbouSV | DQ120357 | 12S  | Cabo Verde | S. Vicente          | -       | -          | Cabo Verde (S. Vicente)  |
| <i>Hm</i> | SVH02*   | OQ267600 | 12S  | Cabo Verde | S. Vicente          | 16.8572 | -24.9811   | Cabo Verde (S. Vicente)  |
| <i>Hm</i> | SVH03*   | OQ267601 | 12S/ | Cabo Verde | S. Vicente          | 16.8576 | -24.9797   | Cabo Verde (S. Vicente)  |
|           |          | OQ266929 | ND2  |            |                     |         |            |                          |
| <i>Hm</i> | SVH04*   | OQ267602 | 12S/ | Cabo Verde | S. Vicente          | 16.8576 | -24.9797   | Cabo Verde (S. Vicente)  |
|           |          | OQ266930 | ND2  |            |                     |         |            |                          |
| <i>Hm</i> | SVH05*   | OQ267603 | 12S  | Cabo Verde | S. Vicente          | 16.8576 | -24.9797   | Cabo Verde (S. Vicente)  |
| <i>Hm</i> | SVH06*   | OQ267604 | 12S  | Cabo Verde | S. Vicente          | 16.8576 | -24.9797   | Cabo Verde (S. Vicente)  |
| <i>Hm</i> | SVH07*   | OQ267605 | 12S  | Cabo Verde | S. Vicente          | 16.8839 | -25.0269   | Cabo Verde (S. Vicente)  |
| <i>Hm</i> | SVH08*   | OQ267606 | 12S  | Cabo Verde | S. Vicente          | 16.8923 | -24.9895   | Cabo Verde (S. Vicente)  |
| <i>Hm</i> | BH34*    | OQ267597 | 12S  | Cabo Verde | Brava               | 14.8695 | -24.6955   | Cabo Verde (Brava)       |
| <i>Hm</i> | SAH10*   | OQ267598 | 12S  | Cabo Verde | Santo Antão         | 17.1819 | -25.0648   | Cabo Verde (Santo Antão) |
| <i>Hm</i> | SAH13*   | OQ267599 | 12S  | Cabo Verde | Santo Antão         | 17.0214 | -25.3316   | Cabo Verde (Santo Antão) |
| <i>Hm</i> | E609.5   | DQ120349 | 12S  | Brazil     | Genipabu            | -       | -          | South America            |
| <i>Hm</i> | E609.7   | DQ120350 | 12S  | Brazil     | Genipabu            | -       | -          | South America            |
| <i>Hm</i> | E609.11  | DQ120351 | 12S  | Brazil     | Fernando de Noronha | -       | -          | South America            |
| <i>Hm</i> | E609.12  | DQ120352 | 12S  | Brazil     | Fernando de Noronha | -       | -          | South America            |
| <i>Hm</i> | E609.9   | DQ120375 | 12S  | Brazil     | Rio Grande do Norte | -       | -          | South America            |
| <i>Hm</i> | E609.10  | DQ120359 | 12S  | Brazil     | Fernando de Noronha | -       | -          | South America            |

|           |            |          |     |                   |                     |   |                 |
|-----------|------------|----------|-----|-------------------|---------------------|---|-----------------|
| <i>Hm</i> | E1109.8    | DQ120361 | 12S | Trinidad & Tobago | Tobago              | - | - South America |
| <i>Hm</i> | E1109.9    | DQ120362 | 12S | Trinidad & Tobago | Tobago              | - | - South America |
| <i>Hm</i> | E509.22    | DQ120363 | 12S | Argentina         | Iguazu              | - | - South America |
| <i>Hm</i> | E609.1     | DQ120364 | 12S | Brazil            | Mato Grosso         | - | - South America |
| <i>Hm</i> | E609.2     | DQ120365 | 12S | Brazil            | Mato Grosso         | - | - South America |
| <i>Hm</i> | E609.3     | DQ120366 | 12S | Brazil            | Mato Grosso         | - | - South America |
| <i>Hm</i> | E609.4     | DQ120367 | 12S | Brazil            | Mato Grosso         | - | - South America |
| <i>Hm</i> | E609.6     | DQ120368 | 12S | Brazil            | Rio Grande do Norte | - | - South America |
| <i>Hm</i> | E609.8     | DQ120369 | 12S | Brazil            | Rio Grande do Norte | - | - South America |
| <i>Hm</i> | E609.13    | DQ120370 | 12S | Brazil            | Pernambuco          | - | - South America |
| <i>Hm</i> | E609.18    | DQ120371 | 12S | Trinidad & Tobago | Trinidad            | - | - South America |
| <i>Hm</i> | E609.19    | DQ120372 | 12S | Trinidad & Tobago | Trinidad            | - | - South America |
| <i>Hm</i> | E609.24    | DQ120373 | 12S | Puerto Rico       | Península de Jobos  | - | - South America |
| <i>Hm</i> | E1109.1    | DQ120374 | 12S | Puerto Rico       | Península de Jobos  | - | - South America |
| <i>Hm</i> | CURC-R 113 | KX645627 | 12S | Uruguay           | -                   | - | - South America |
| <i>Hm</i> | E1708.13   | DQ120348 | 12S | Equatorial Guinea | Bioko Island        | - | - West Africa   |
| <i>Hm</i> | 37HmabSTo  | DQ120358 | 12S | STP               | São Tomé            | - | - West Africa   |

---
