# Supplementary figures and images for: Aliens on Boats? The Eastern and Western Expansion of the African House Gecko
Source: MDPI journal article supplement (doi:10.3390/genes14020381), 2023-01-31

A

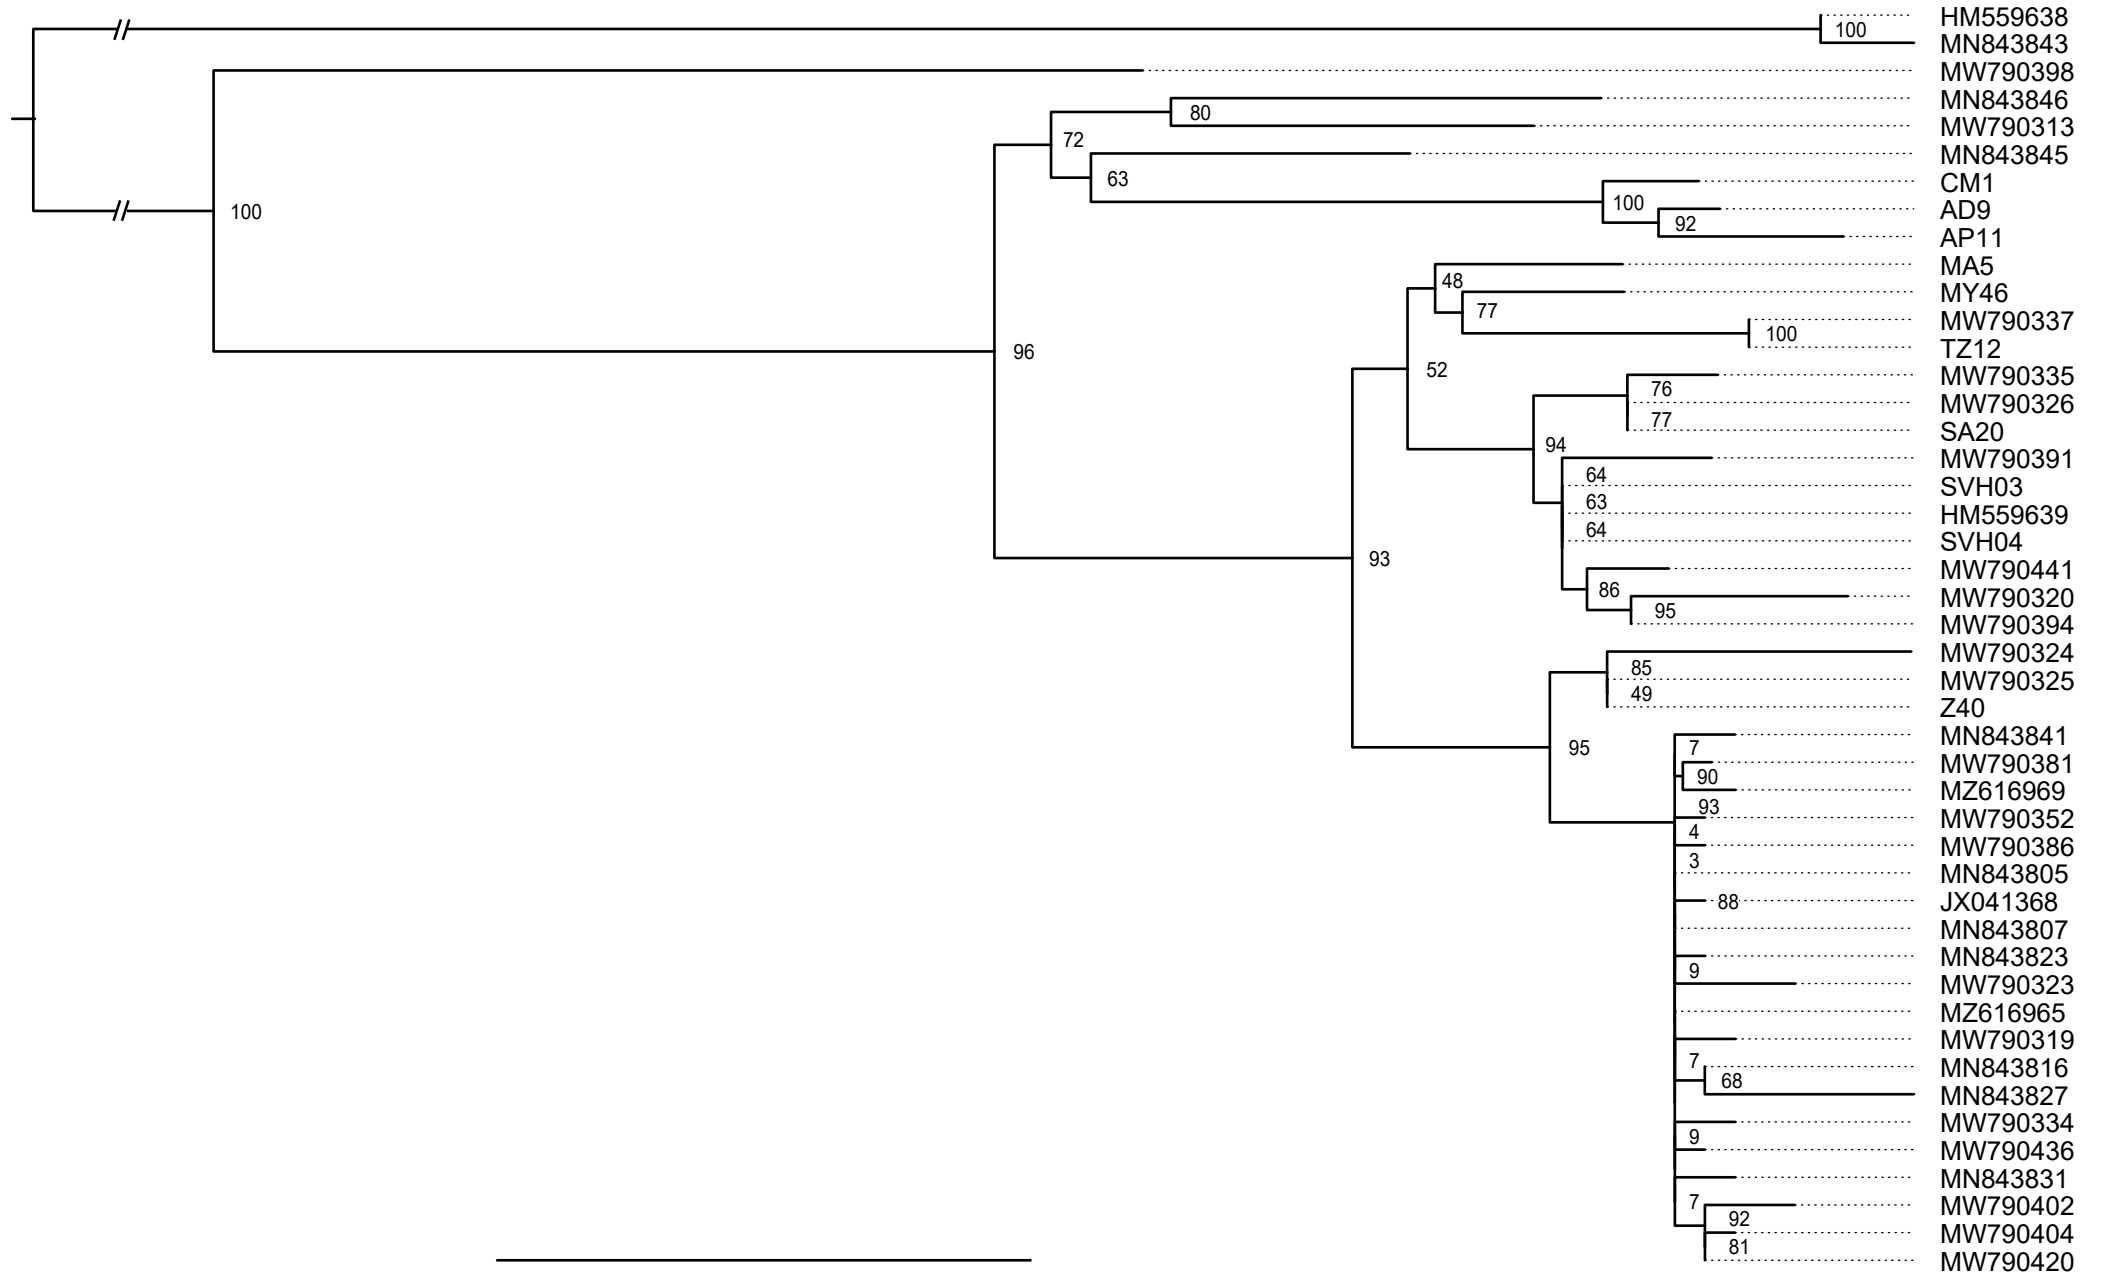

B

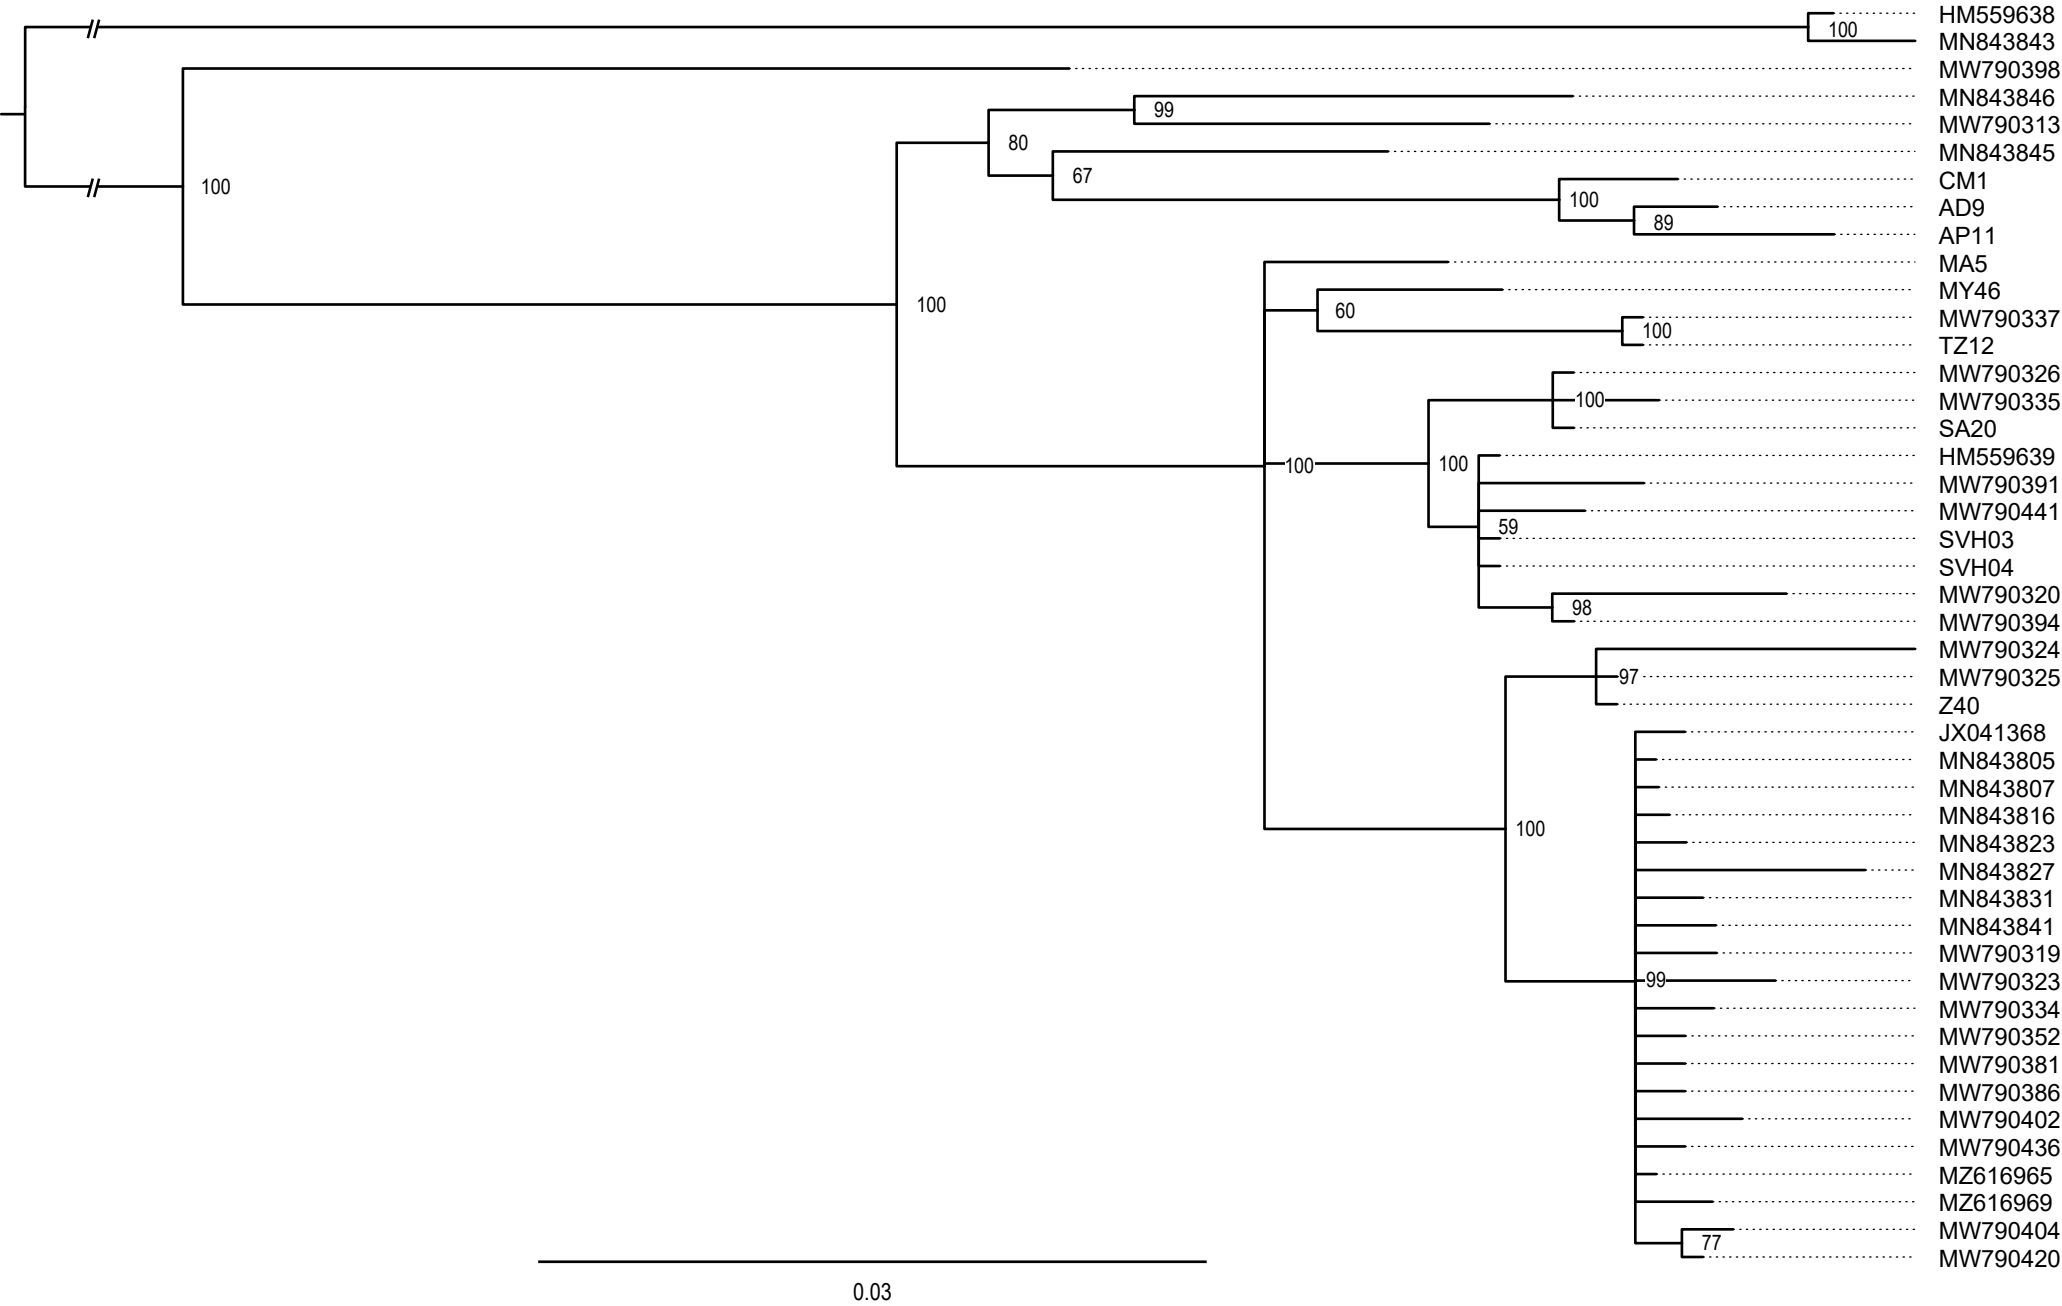

Supplement: s1 [file s1]
